# Supplementary material
Source: PubMed Central journal article supplement (PMC2758726)
Supplement: jc.2009-0135_2.pdf [file jc.2009-0135_2.pdf]

**Supplemental Table 1. Baseline Participant Characteristics**

|                                           | Mean $\pm$ SEM |
|-------------------------------------------|----------------|
| <b>Age (years)</b>                        | 44 $\pm$ 3     |
| <b>Body Mass Index (kg/m<sup>2</sup>)</b> | 28 $\pm$ 1     |
| <b>HT (cm)</b>                            | 178 $\pm$ 1    |
| <b>WT (kg)</b>                            | 88 $\pm$ 5     |
|                                           |                |
| <b>LH (IU/L)</b>                          | 4 $\pm$ 0.5    |
| <b>FSH (IU/L)</b>                         | 3 $\pm$ 0.3    |
| <b>Total Testosterone (ng/dL)</b>         | 455 $\pm$ 35   |
| <b>Bioavailable Testosterone (ng/dL)</b>  | 125 $\pm$ 16   |
| <b>Free Testosterone (ng/dL)</b>          | 14 $\pm$ 1     |
| <b>Estradiol (pg/dL)</b>                  | 24 $\pm$ 2     |

Data are for 23 men.
