# Supplementary material
Source: PubMed Central journal article supplement (PMC2758726)
Supplement: jc.2009-0135_3.pdf [file jc.2009-0135_3.pdf]

**Supplemental Table 2. T Dose and Age Effects on Mean T and LH Concentrations.**

| Outcome         | Placebo                | T Dose                  |                                    |                        | P<br>Dose         | P<br>Age |
|-----------------|------------------------|-------------------------|------------------------------------|------------------------|-------------------|----------|
|                 |                        | 2.5 mg/day              | 5 mg/day                           | 7.5 mg/day             |                   |          |
| LH (IU/L)       | 9.9 ± 0.7 <sup>A</sup> | 7.8 ± 0.7 <sup>B</sup>  | 6.6 ± 0.7 <sup>C</sup>             | 5.5 ± 0.7 <sup>C</sup> | 10 <sup>-3</sup>  | 0.37     |
| Total T (ng/dL) | 33 ± 50 <sup>A</sup>   | 283 ± 31 <sup>B</sup>   | 423 ± 48 <sup>B</sup>              | 644 ± 89 <sup>C</sup>  | 10 <sup>-3</sup>  | 0.95     |
| Free T (ng/dL)  | 0.7 ± 0.1 <sup>A</sup> | 8.9 ± 2.1 <sup>AB</sup> | 14 <sup>B</sup> ± 2.8 <sup>B</sup> | 27 ± 6.5 <sup>C</sup>  | <10 <sup>-3</sup> | 0.37     |
| Bio T (ng/dL)   | 7.8 ± 1.3 <sup>A</sup> | 99 ± 24 <sup>AB</sup>   | 159 ± 31 <sup>B</sup>              | 299 ± 74 <sup>C</sup>  | <10 <sup>-3</sup> | 0.37     |

Data are the mean ± SEM. Repeated-measures ANOVA revealed effects of T dose but not age.

Means with unique (unshared) alphabetic superscripts differ significantly ( $P < 0.05$ ) by *post hoc* Bonferroni's test.

Thus, A differs from B and C, but not from AB. Data are from 23 men.
