# Supplementary material
Source: PubMed Central journal article supplement (PMC2758726)
Supplement: jc.2009-0135_4.pdf [file jc.2009-0135_4.pdf]

**Supplemental Table 3. Testosterone and age effects on LH secretion**

|                       | Testosterone Dose (g)  |                        |                        |                        | ANOVA             | Covariates |
|-----------------------|------------------------|------------------------|------------------------|------------------------|-------------------|------------|
|                       | 0                      | 2.5                    | 5                      | 7.5                    | P (dose)          | P (age)    |
| <b>LH Pulse</b>       |                        |                        |                        |                        |                   |            |
| Frequency (no/24)     | 20 ± 1.2 <sup>A</sup>  | 17 ± 1.1 <sup>AB</sup> | 15 ± 1.0 <sup>BC</sup> | 12 ± 0.7 <sup>C</sup>  | <10 <sup>-3</sup> | 0.23       |
| <b>Interpulse</b>     |                        |                        |                        |                        |                   |            |
| Regularity (unitless) | 2.9 ± 0.1              | 3.4 ± 0.4              | 3.6 ± 0.4              | 3.4 ± 0.3              | 0.42              | 0.08       |
| <b>LH Secretary-</b>  |                        |                        |                        |                        |                   |            |
| Burst Mass (IU/L)     | 2.5 ± 0.3 <sup>A</sup> | 3.8 ± 0 <sup>B</sup>   | 4.0 ± 0.4 <sup>B</sup> | 3.9 ± 0.4 <sup>B</sup> | 0.0003            | 0.0043     |
| <b>Basal LH</b>       |                        |                        |                        |                        |                   |            |
| Secretion (IU/L/24 h) | 121 ± 10 <sup>A</sup>  | 84 ± 12 <sup>B</sup>   | 71 ± 9 <sup>BC</sup>   | 53 ± 8 <sup>C</sup>    | <10 <sup>-3</sup> | 0.88       |
| <b>Pulsatile LH</b>   |                        |                        |                        |                        |                   |            |
| Secretion (IU/L/24 h) | 26 ± 2.8 <sup>A</sup>  | 34 ± 3.6 <sup>A</sup>  | 33 ± 3.3 <sup>A</sup>  | 27 ± 2.8 <sup>A</sup>  | 0.024             | 0.0005     |

---

Data are the mean  $\pm$  SEM. Repeated-measures ANOVA was used to assess the effects of T dose. The effect of age as a covariate is also shown.

Means with unique (unshared) alphabetic superscripts differ significantly ( $P < 0.05$ ) by *post hoc* testing.

No between-group contrasts were detected for T-dose effects on secretion.
